# Supplementary material for: A convolutional neural network segments yeast microscopy images with high accuracy
Source: PubMed Central journal article supplement (PMC7665014; doi:10.1038/s41467-020-19557-4), 2020-11-12
Supplement: 41467_2020_19557_MOESM1_ESM.pdf [file 41467_2020_19557_MOESM1_ESM.pdf]

## Supplementary Material

A convolutional neural network segments yeast  
microscopy images with high accuracy

Dietler et al.

## Supplementary Figures

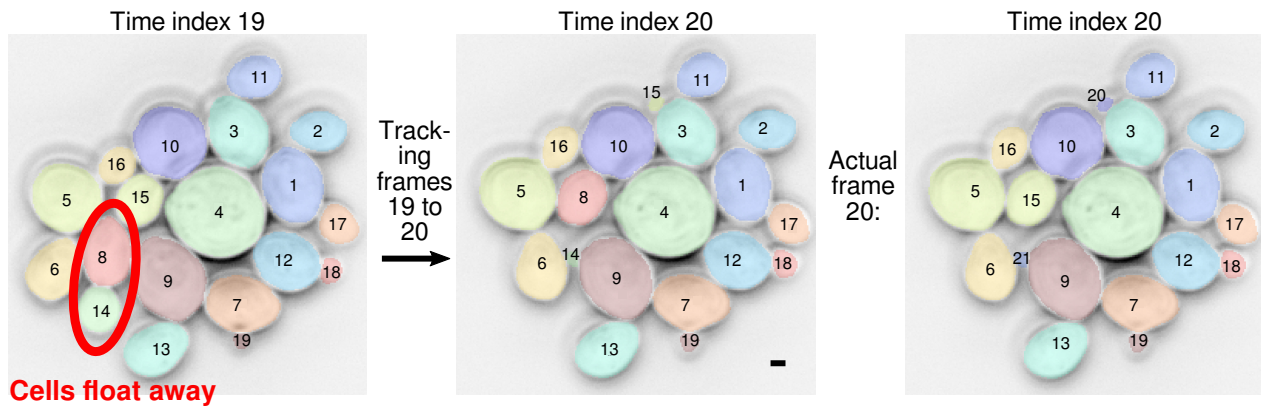

Supplementary Figure 1: Tracking errors caused by two cells floating out of the field of view. Scale bar: 1  $\mu\text{m}$ .

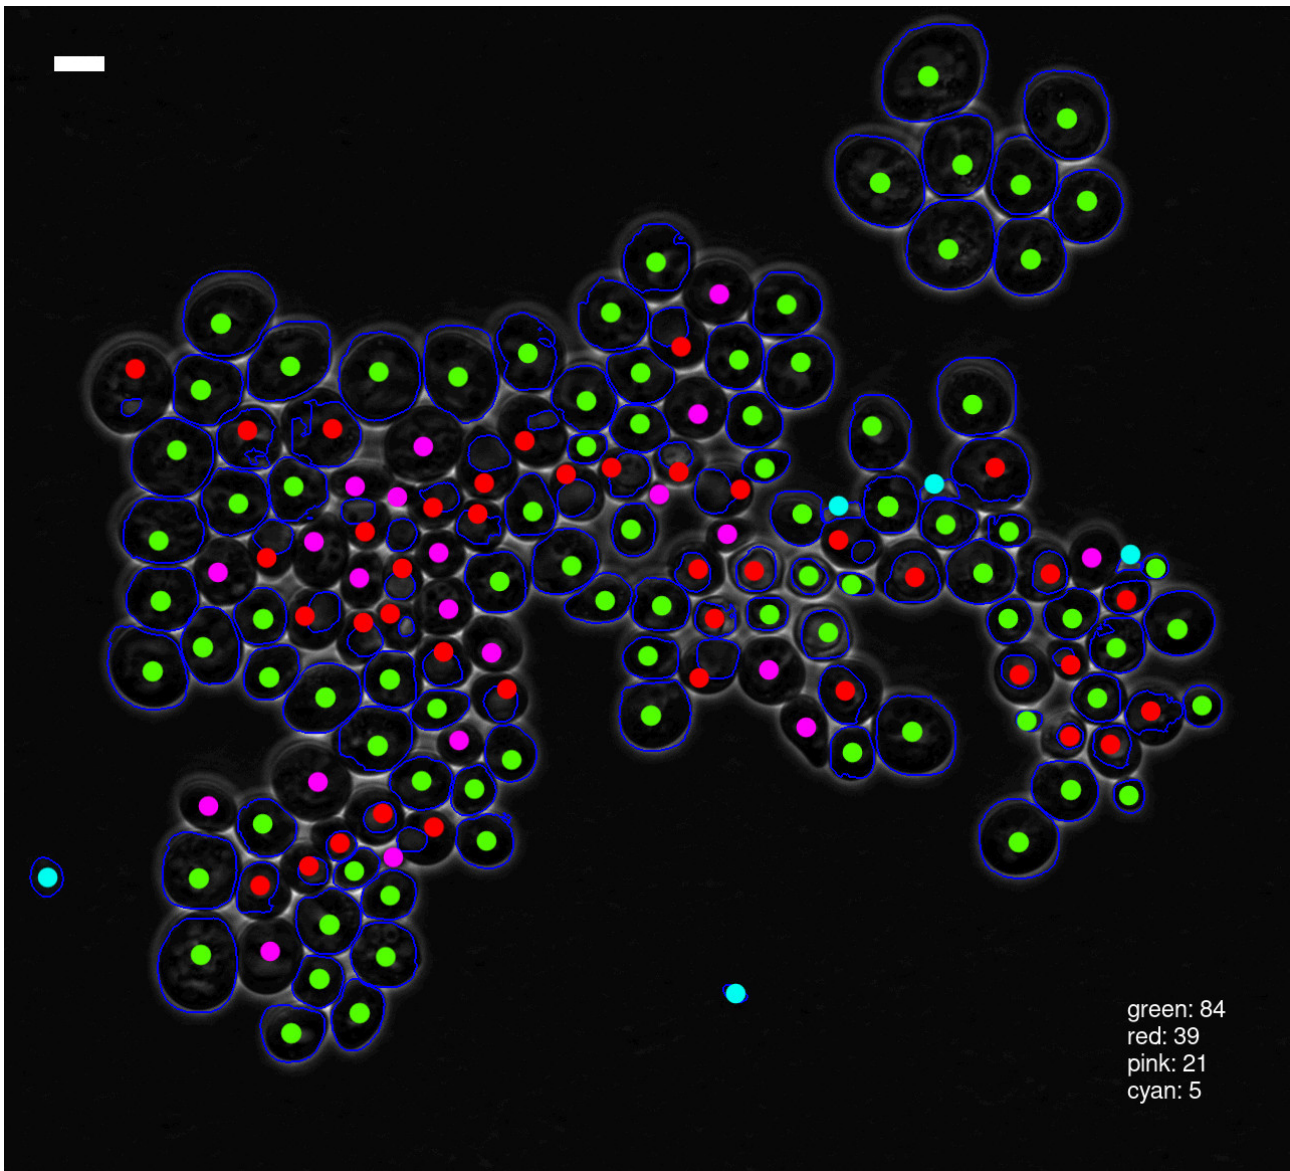

Supplementary Figure 2: Scoring of YeastSpotter results. Green dots: acceptable segmentation, red: bad segmentation, pink: missed cell, cyan: spurious cell. Scale bar: 5  $\mu\text{m}$ .

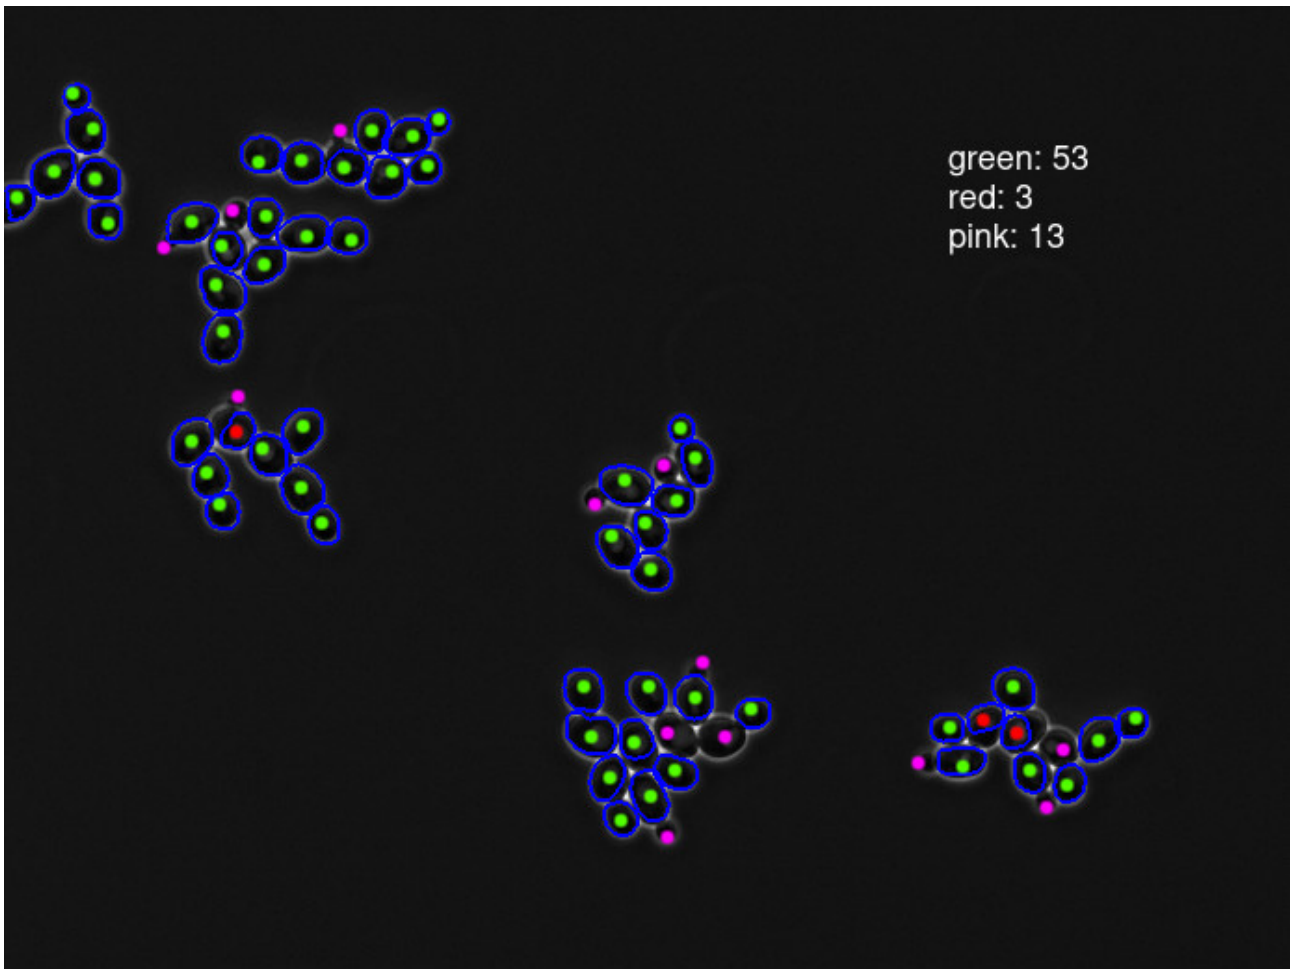

Supplementary Figure 3: Scoring of YeastSpotter results. Green dots: acceptable segmentation, red: bad segmentation, pink: missed cell, cyan: spurious cell. Image from ref. (1), scale bar unknown.

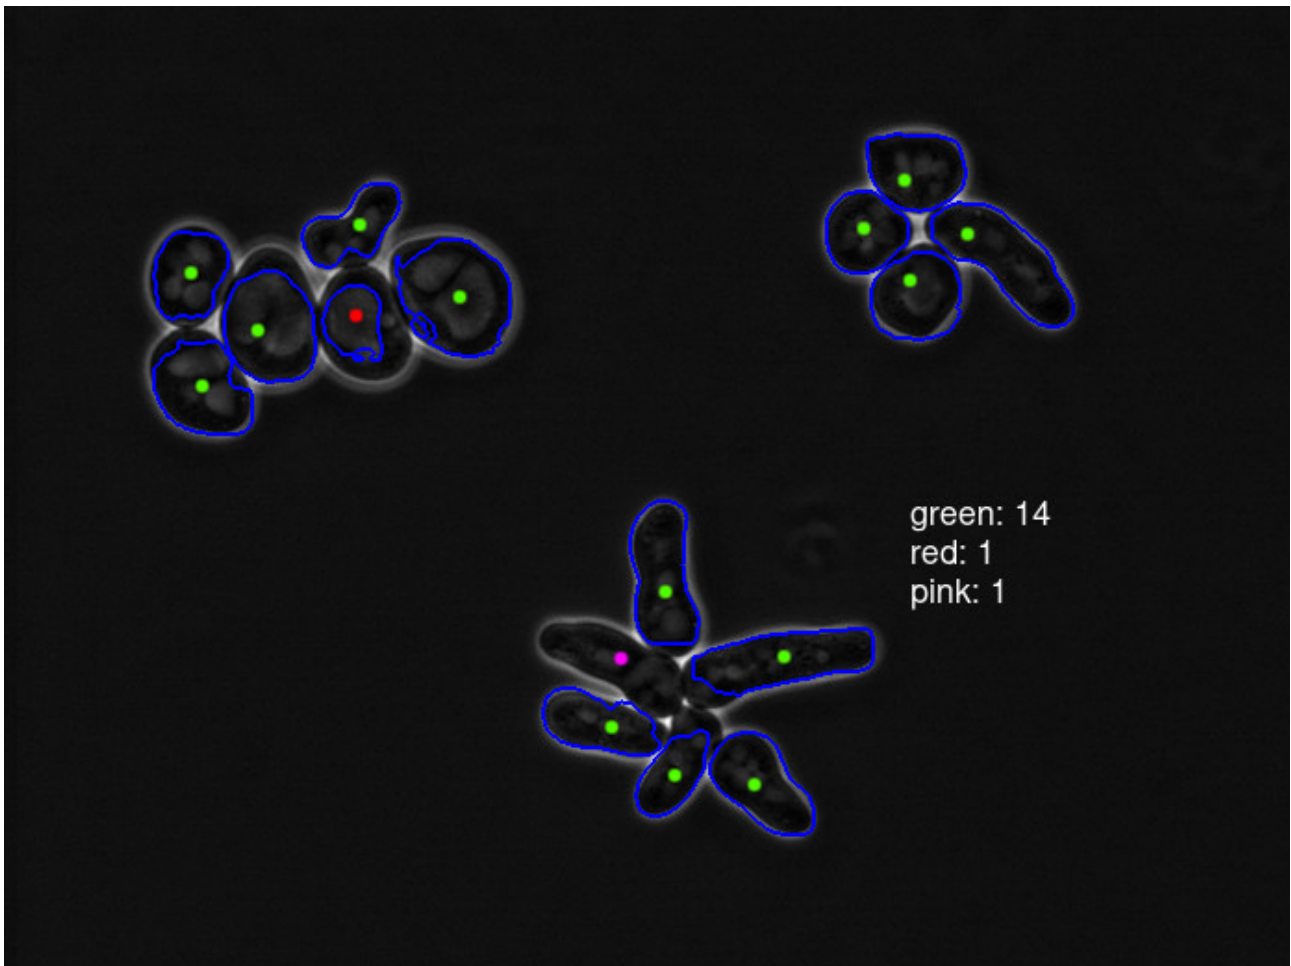

Supplementary Figure 4: Scoring of YeastSpotter results. Green dots: acceptable segmentation, red: bad segmentation, pink: missed cell, cyan: spurious cell. Image from ref. (1), scale bar unknown.

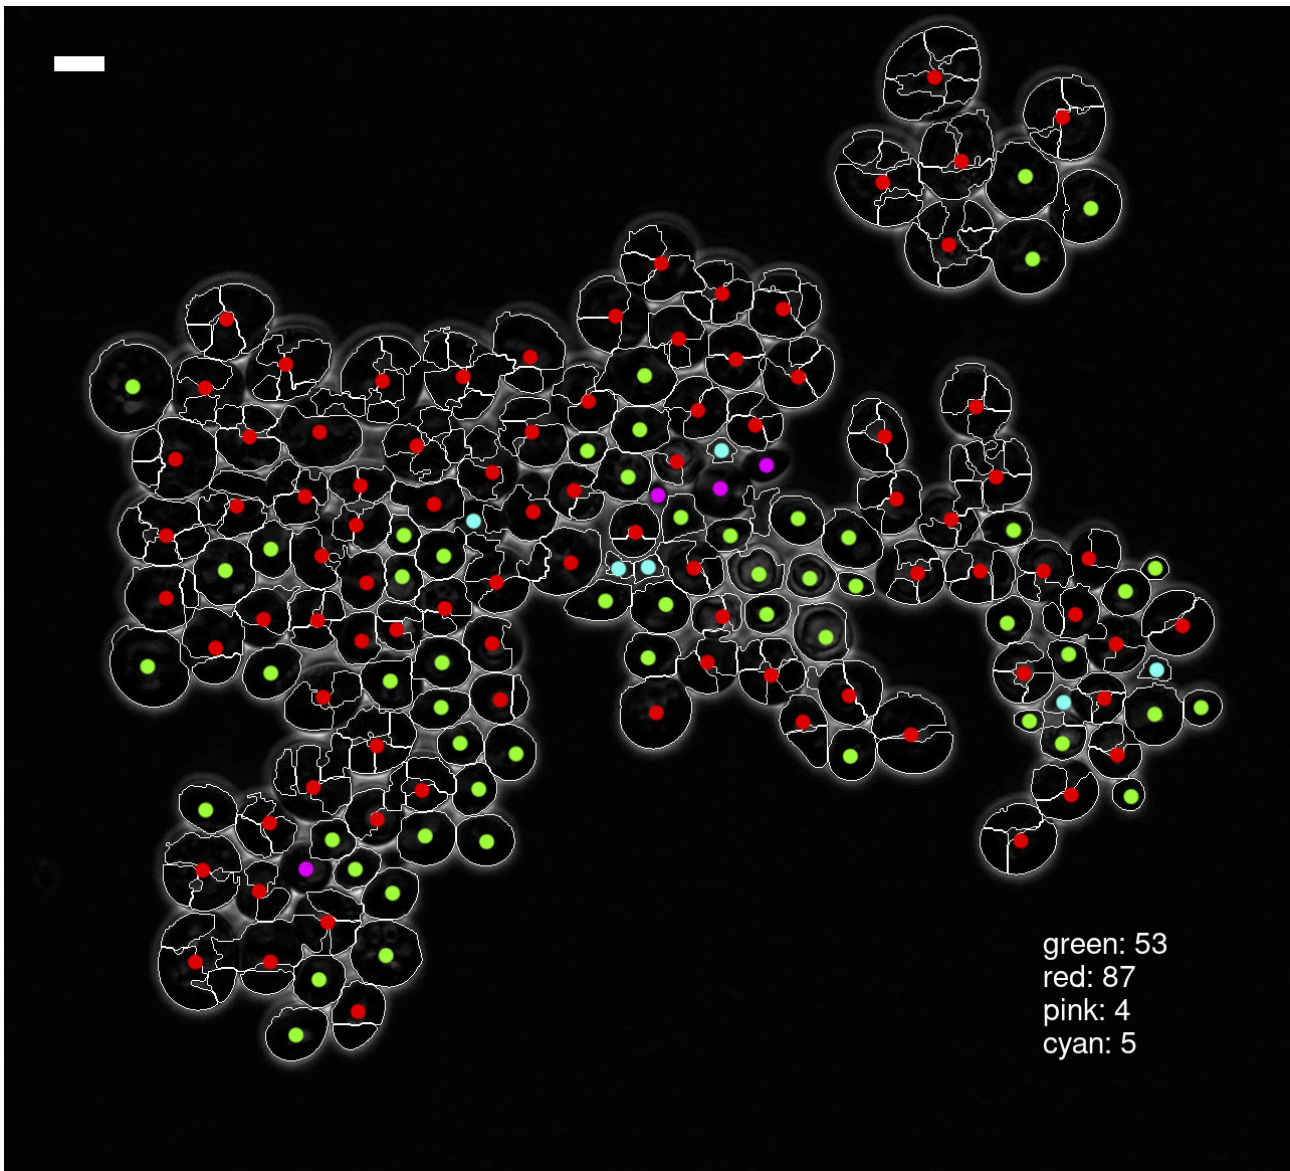

Supplementary Figure 5: Scoring of the results of the method by Wood et al. (2). Green dots: acceptable segmentation, red: bad segmentation, pink: missed cell, cyan: spurious cell. Scale bar: 5  $\mu\text{m}$ .

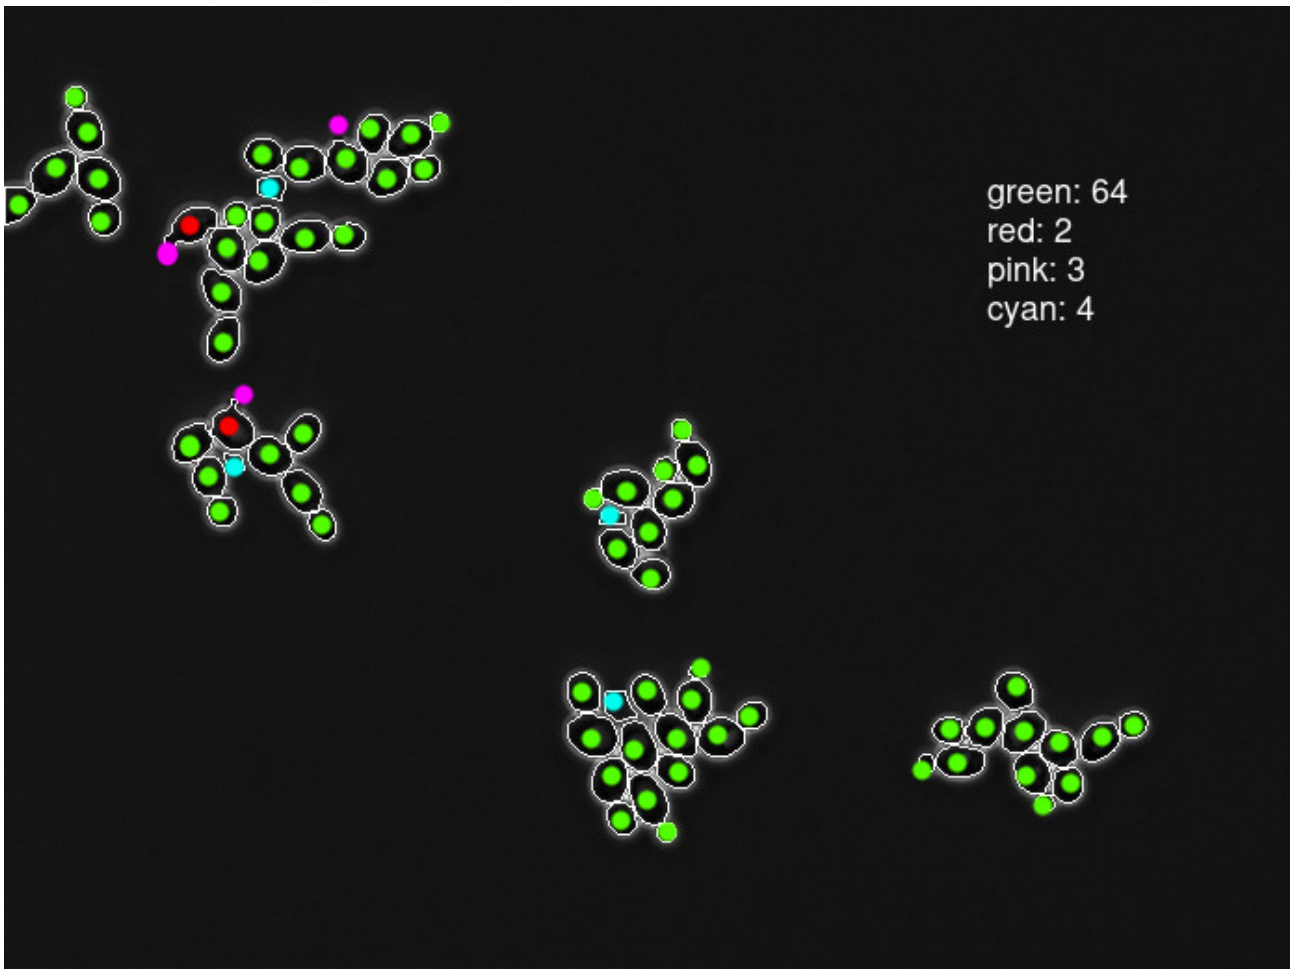

Supplementary Figure 6: Scoring of the results of the method by Wood et al. (2). Green dots: acceptable segmentation, red: bad segmentation, pink: missed cell, cyan: spurious cell. Image from ref. (1), scale bar unknown.

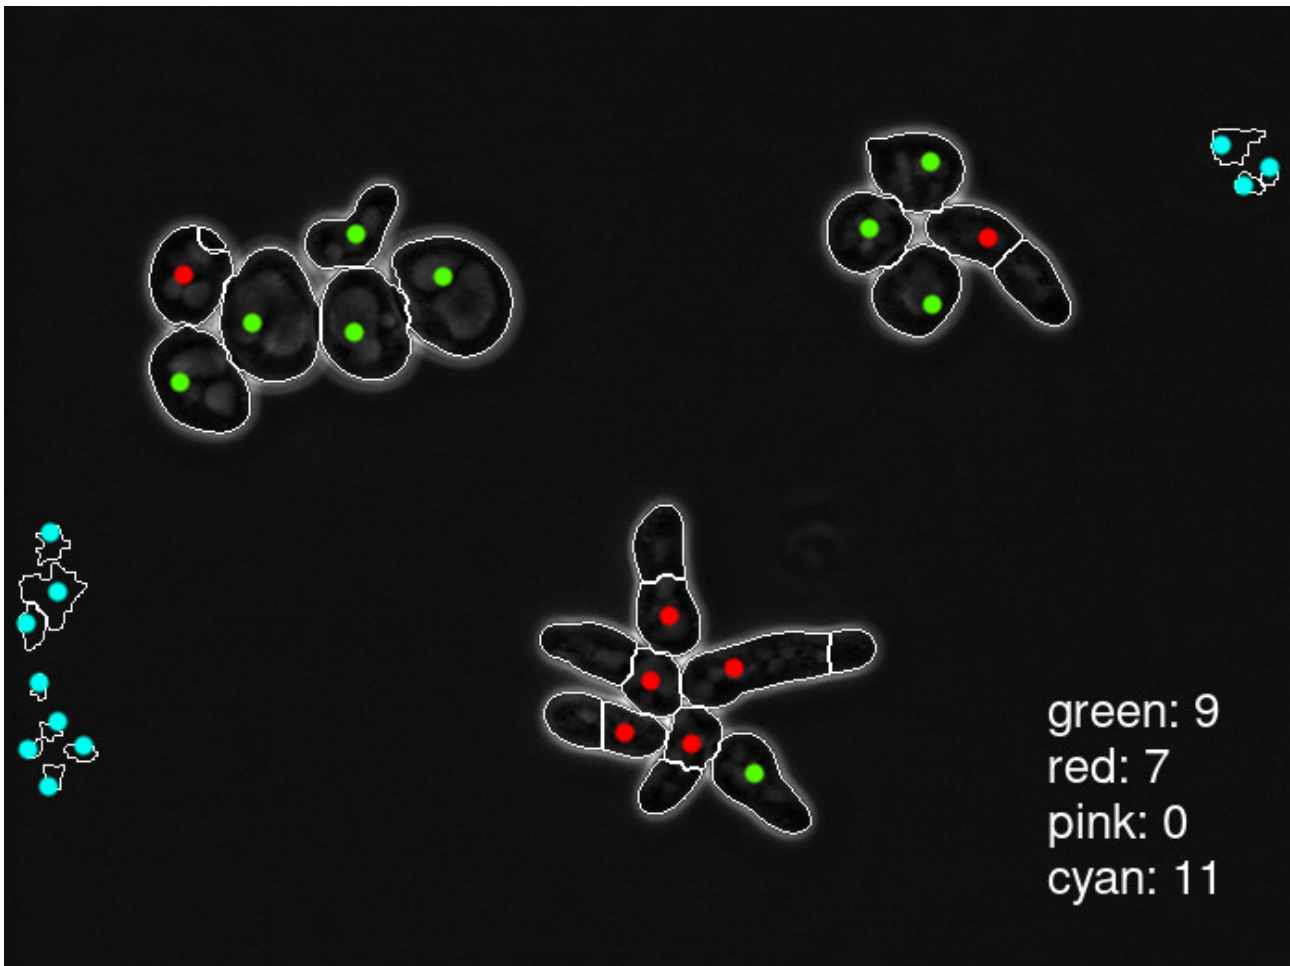

Supplementary Figure 7: Scoring of the results of the method by Wood et al. (2). Green dots: acceptable segmentation, red: bad segmentation, pink: missed cell, cyan: spurious cell. Image from ref. (1), scale bar unknown.



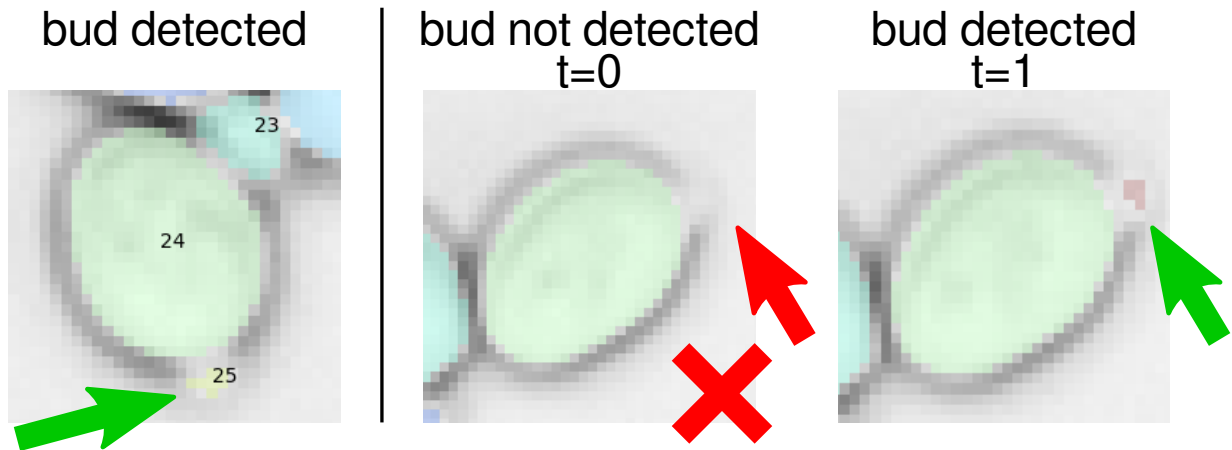

Supplementary Figure 8: Examples of tiny buds in data set 9 from ref. (1), some only a few pixels in size, that were detected by the YeaZ CNN (left and right) except for four such tiny buds (middle example). The missed bud (middle) was, however, detected at the next time point in the timelapse series (right) when it was slightly bigger. Image from ref. (1), scale bar unknown.

## Supplementary Tables

Supplementary Table 1: Training set images

| File name                          | Number of image layers | Number of cells |
|------------------------------------|------------------------|-----------------|
| a_reexport1_crop_1                 | 75                     | 1914            |
| a_reexport2_crop_1                 | 42                     | 703             |
| a_reexport3_crop_1                 | 41                     | 132             |
| a_reexport3_crop_2                 | 2                      | 0               |
| d_reexport1_crop_1                 | 30                     | 110             |
| d_reexport1_crop_2                 | 30                     | 764             |
| d_reexport1_crop_3                 | 30                     | 412             |
| d_reexport1_crop_4                 | 1                      | 30              |
| d_reexport2_crop_1                 | 1                      | 20              |
| d_reexport2_crop_2                 | 30                     | 345             |
| d_reexport2_crop_3                 | 30                     | 611             |
| m_reexport1_crop_1                 | 18                     | 1637            |
| v_cdc20null_crop_1                 | 1                      | 171             |
| v_clnnull_crop_1                   | 1                      | 107             |
| Ahmad_frame_16_crop_1              | 5                      | 251             |
| Ahmad_frame_16_crop_2              | 5                      | 18              |
| Ahmad_frame_16_crop_3              | 5                      | 10              |
| Ahmad_frame_16_crop_4              | 5                      | 247             |
| Ahmad_frame_19_crop_1              | 5                      | 208             |
| Ahmad_frame_19_crop_2              | 5                      | 158             |
| Ahmad_frame_19_crop_3              | 5                      | 135             |
| V11032020_p1_crop_1                | 1                      | 27              |
| V11032020_p2_crop_1                | 4                      | 200             |
| V11032020_p3_crop_1                | 2                      | 105             |
| 2020_3_24_AS20_1_AS18_Pos11_crop_1 | 5                      | 137             |
| 2020_3_24_AS20_1_AS18_Pos11_crop_2 | 5                      | 76              |
| Total                              | 384                    | 8528            |

Supplementary Table 2: Bright-field image segmentations

| File name                    | Number of image layers | Number of cells |
|------------------------------|------------------------|-----------------|
| FOV2_1.5p_PhC_absent_crop_1  | 1                      | 97              |
| FOV3_1.5p_PhC_absent_crop_1  | 1                      | 83              |
| FOV4_1.5p_PhC_absent_crop_1  | 1                      | 83              |
| FOV5_1.5p_PhC_absent_crop_1  | 1                      | 47              |
| FOV6_1.5p_PhC_absent_crop_1  | 1                      | 107             |
| FOV7_1.5p_PhC_absent_crop_1  | 1                      | 100             |
| FOV8_1.5p_PhC_absent_crop_1  | 1                      | 129             |
| FOV9_1.5p_PhC_absent_crop_1  | 1                      | 58              |
| FOV9_1.5p_PhC_absent_crop_2  | 1                      | 206             |
| FOV10_1.5p_PhC_absent_crop_1 | 1                      | 274             |
| FOV10_1.5p_PhC_absent_crop_2 | 1                      | 62              |
| FOV11_1.5p_PhC_absent_crop_1 | 1                      | 62              |
| FOV12_1.5p_PhC_absent_crop_1 | 1                      | 181             |
| FOV13_1.5p_PhC_absent_crop_1 | 1                      | 74              |
| FOV14_1.5p_PhC_absent_crop_1 | 1                      | 105             |
| FOV15_1.5p_PhC_absent_crop_1 | 1                      | 62              |
| Total                        | 16                     | 1730            |

Supplementary Table 3: Strains used.

| Name       | Mating type locus | Genotype                                                                                                                                                                       |
|------------|-------------------|--------------------------------------------------------------------------------------------------------------------------------------------------------------------------------|
| AX42-25A   | MAT $\alpha$      | wild type W303                                                                                                                                                                 |
| JB204-6B   | MAT $\alpha$      | ADE2 HTB2-mCherry::HIS5                                                                                                                                                        |
| SJR112a12d | MAT $\alpha$      | cln1 $\Delta$ 0 cln2 $\Delta$ 0::MET3pr-CLN2 cln3 $\Delta$ 0 HTB2-mCherry::HIS5 ura3 $\Delta$ 0                                                                                |
| SJR33h6d   |                   | clb2 $\Delta$ ::LEU2 trp1 $\Delta$ ::TRP1::GAL-SIC1(1X) HTB2-mCherry:HIS5 MYO1-GFP::KanMX                                                                                      |
| SJR36a11b  | MAT $\alpha$      | cln1 $\Delta$ cln2 $\Delta$ :CLN2pr-Venus:TRP1 cln3 $\Delta$ :LEU2 trp1 $\Delta$ :TRP1:MET3pr-CLN2 clb5 $\Delta$ :HIS3 clb6 $\Delta$ :KanMX HTB2-mCherry:HIS5                  |
| CL86-1-11D | MAT $\alpha$      | clb1 $\Delta$ clb2 $\Delta$ ::GALL-CLB2::URA3 clb3 $\Delta$ ::TRP1 clb4 $\Delta$ ::his3 $\Delta$ ::kanMX clb5 $\Delta$ ::kanMX clb6 $\Delta$ ::kanMX swe1 $\Delta$ ::TRP1 ADE2 |
| 2147-1C    | MAT $\alpha$      | cdc20 $\Delta$ ::LEU2 ADE2::GALL-CDC20                                                                                                                                         |
| AS18       | MAT $\alpha$ syn  | cln1 $\Delta$ 0 cln2 $\Delta$ 0::MET3pr-CLN2 cln3 $\Delta$ 0::GAL1pr-HO HTB2-mCherry::HIS5 ADH1pr-HOcs-YFP                                                                     |

## References

- (1) Mróz, F., Kaczmarek, A. & Stoma, S. YIT - Yeast Image Toolkit. <http://yeast-image-toolkit.biosim.eu/pmwiki.php> (accessed: 15.02.2020).
- (2) Wood, N. E. & Doncic, A. A fully-automated, robust, and versatile algorithm for long-term budding yeast segmentation and tracking. *PLoS One* **14**, 1–28 (2019).
